# Supplementary material
Source: publisher site journal article supplement (https://www.spandidos-publications.com/6165/downloadSupplementary)

Figure S1. Flow chart of the present study. KIF20B, kinesin family member 20B; si, small interfering; qPCR, quantitative PCR; WB, western blotting; ICC, immunocytochemistry.

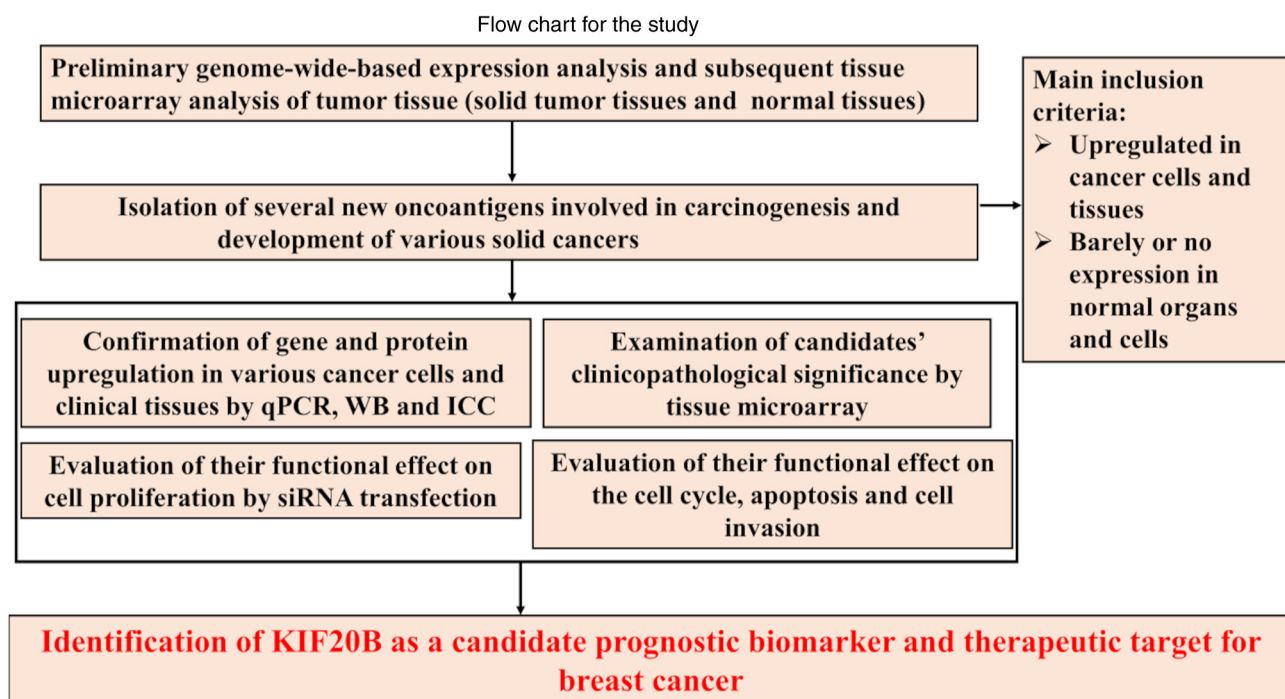

Figure S2. Representative flow cytometry plots indicating the cell cycle distribution in (A) T-47D, (B) HCC1937 and (C) SK-BR-3 cells after transfection with si-KIF20B#2 or si-control. KIF20B, kinesin family member 20B; si, small interfering.

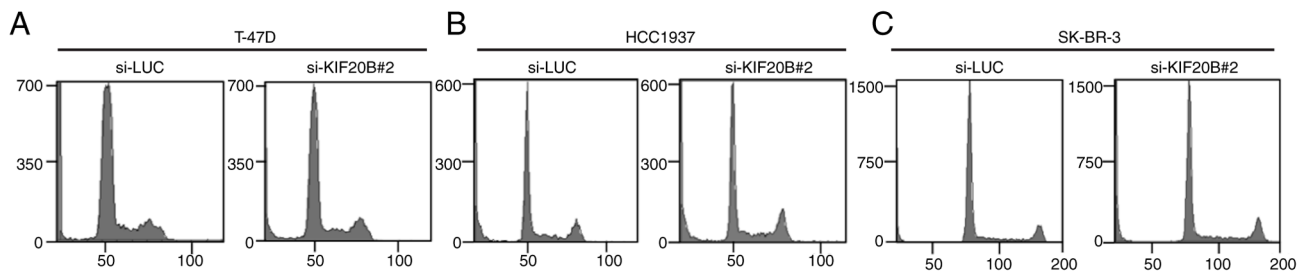

Figure S3. Representative plots of (A) T-47D, (B) HCC1937 and (C) SK-BR-3 apoptotic cells detected via Annexin V-FITC/PI staining assay after transfection with si-KIF20B#2 or si-control. KIF20B, kinesin family member 20B; si, small interfering; FITC, fluorescein isothiocyanate; PI, propidium iodide.

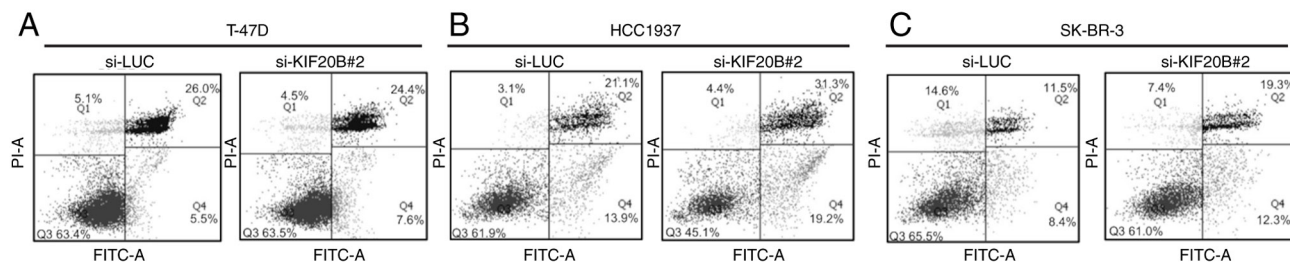

Figure S4. Schematic mechanism of breast cancer cell death induced by KIF20B knockdown as a new therapeutic strategy. KIF20B, kinesin family member 20B.

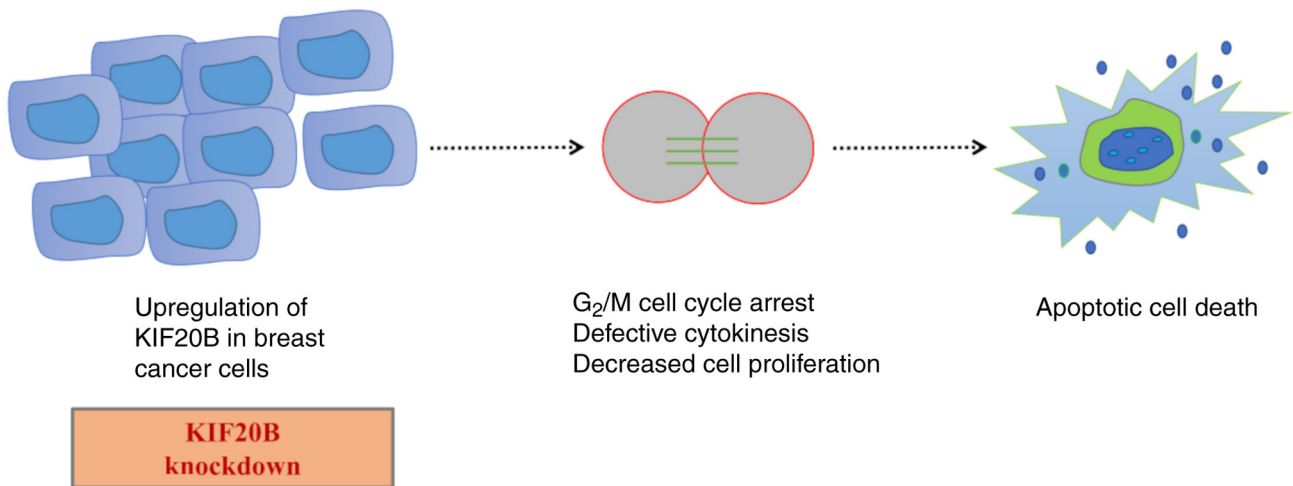

Supplement: Supplementary file 1 [file downloadSupplementary]
